# Supplementary material for: Predictors of Patient-Reported Incontinence at Adjuvant/Salvage Radiotherapy after Prostatectomy: Impact of Time between Surgery and Radiotherapy
Source: MDPI journal article supplement (doi:10.3390/cancers13133243), 2021-06-29
Supplement: s1 [file s1]

**Table S1.** Median value and interquartile range of scores in the EPQ-R and in ICIQ-SF questionnaires at baseline (immediately before the beginning of the radiotherapy).

| EPQR |                 |   |          |
|------|-----------------|---|----------|
|      | Psychoticism    | 1 | (0 – 2)  |
|      | Extraversion    | 4 | (3 – 5)  |
|      | Lie             | 5 | (4 – 6)  |
|      | Neuroticism     | 1 | (0 – 3)  |
|      | ICIQ-SF         |   |          |
|      | Daily Frequency | 2 | (0 – 4)  |
|      | Amount of Loss  | 2 | (0 – 2)  |
|      | Subjective      | 1 | (0 – 4)  |
|      | Objective       | 4 | (0 – 6)  |
|      | Total           | 5 | (0 – 10) |

EPQ-R = Eysenck Personality Questionnaire Revised; ICIQ-SF = International Consultation on Incontinence Modular Questionnaire Short Form.

**Table S2.** Coefficients, standard deviation and *p*-value of the sigmoid curve fitting. The most informative cut-off which discriminates each endpoint in terms of time-to-RT is also reported.

| ICIQ Based End-points | $ICIQscore = \frac{a}{1 + e^{-b(TTTR - c)}} + d$ |                 | Most Informative Cut-off (Months) |
|-----------------------|--------------------------------------------------|-----------------|-----------------------------------|
|                       | Coeff. $\pm$ St. dev.                            | <i>p</i> -value |                                   |
| Daily Frequency       | a = 1.158 $\pm$ 0.090                            | < 0.0001        | 6.7                               |
|                       | b = -1.537 $\pm$ 0.680                           | 0.065           | Sensitivity: 63.7%                |
|                       | c = 6.501 $\pm$ 0.268                            | < 0.0001        | Specificity: 65.8%                |
|                       | d = 1.540 $\pm$ 0.046                            | < 0.0001        |                                   |
| Amount of Loss        | a = 0.953 $\pm$ 0.126                            | < 0.0001        | 7.2                               |
|                       | b = -0.813 $\pm$ 0.405                           | 0.092           | Sensitivity: 74.6%                |
|                       | c = 7.605 $\pm$ 0.753                            | < 0.0001        | Specificity: 54.7%                |
|                       | d = 1.376 $\pm$ 0.061                            | < 0.0001        |                                   |
| Subjective            | a = 1.651 $\pm$ 0.374                            | < 0.0001        | 7.1                               |
|                       | b = -0.746 $\pm$ 0.585                           | 0.249           | Sensitivity: 66.3%                |
|                       | c = 7.551 $\pm$ 1.262                            | < 0.0001        | Specificity: 55.4%                |
|                       | d = 1.509 $\pm$ 0.166                            | < 0.0001        |                                   |
| Objective             | a = 2.083 $\pm$ 0.133                            | < 0.0001        | 6.7                               |
|                       | b = -1.242 $\pm$ 0.480                           | 0.041           | Sensitivity: 65.1%                |
|                       | c = 6.832 $\pm$ 0.229                            | < 0.0001        | Specificity: 62.0%                |
|                       | d = 2.932 $\pm$ 0.063                            | < 0.0001        |                                   |
| Total                 | a = 3.694 $\pm$ 0.382                            | < 0.0001        | 7.8                               |
|                       | b = -1.177 $\pm$ 0.745                           | 0.165           | Sensitivity: 70.2%                |
|                       | c = 6.991 $\pm$ 0.411                            | < 0.0001        | Specificity: 58.2%                |
|                       | d = 4.457 $\pm$ 0.183                            | < 0.0001        |                                   |

TTTR = time-to-radiotherapy, i.e. months elapsed between radical prostatectomy and adjuvant or salvage RT.

**Table S3.** Results of backward stepwise multi-variable logistic regression analyses performed with the most significant variables (*p* < 0.1) excluding EPQ-R predictors. The main performances of the models are also reported.

|                                                                                                                                     | Coeff. $\pm$ St. dev. | Odds Ratio (95% CI) | <i>p</i> -value |
|-------------------------------------------------------------------------------------------------------------------------------------|-----------------------|---------------------|-----------------|
| <b>(a) Daily Frequency end-point: ICIQ3 &gt; 2 (n = 171/408, 42%)</b>                                                               |                       |                     |                 |
| TTTR (cut-off: 6.7 mo)                                                                                                              | 1.260 $\pm$ 0.214     | 3.53 (2.32 – 5.36)  | < 0.0001        |
| Age                                                                                                                                 | 0.039 $\pm$ 0.016     | 1.04 (1.01 – 1.07)  | 0.014           |
| Constant:                                                                                                                           | -3.551                |                     |                 |
| H&L <i>p</i> -value = 0.576; Brier score = 0.220 (Corrected for optimism: 0.223); Calibration slope = 0.968; R <sup>2</sup> = 0.866 |                       |                     |                 |
| <b>(b) Amount of Loss end-point: ICIQ4 &gt; 2 (n = 59/408, 14%)</b>                                                                 |                       |                     |                 |

TTRT (cut-off: 7.2 mo) 1.266 ± 0.318 3.55 (1.94 – 6.81) 0.0001  
 Constant: -2.544  
 H&L *p*-value = 1.000; Brier score = 0.118 (Corrected for optimism: 0.119); Calibration slope = 1.000; R<sup>2</sup> = 1.000

**(c) Subjective end-point: ICIQ5 > 4 (*n* = 83/408, 20%)**

TTRT (cut-off: 7.1 mo) 0.838 ± 0.256 2.31 (1.41 – 3.86) 0.001  
 Constant: -1.826  
 H&L *p*-value = 1.000; Brier score = 0.158 (Corrected for optimism: 0.159); Calibration slope = 1.000; R<sup>2</sup> = 1.000

**(d) Objective end-point: ICIQ3+ICIQ4 > 5 (*n* = 129/408, 32%)**

TTRT (cut-off: 6.7 mo) 1.139 ± 0.225 3.12 (2.02 – 4.89) < 0.0001  
 Age 0.038 ± 0.017 1.04 (1.00 – 1.07) 0.027  
 Constant: -3.862  
 H&L *p*-value = 0.678; Brier score = 0.200 (Corrected for optimism: 0.203); Calibration slope = 0.985 ; R<sup>2</sup> = 0.799

**(f) Total end-point: ICIQ3+ICIQ4+ICIQ5 > 8 (*n* = 121/408, 30%)**

TTRT (cut-off: 7.8 mo) 1.150 ± 0.231 3.16 (2.02 – 5.01) < 0.0001  
 Constant: -1.507  
 H&L *p*-value = 1.000.; Brier score = 0.195 (Corrected for optimism: 0.198); Calibration slope = 1.000; R<sup>2</sup> = 1.000

|                                                                                                                                     | Coeff. ± St. dev. | Odds ratio (95% CI) | <i>p</i> -value |
|-------------------------------------------------------------------------------------------------------------------------------------|-------------------|---------------------|-----------------|
| <b>Completely Dry end-point: ICIQ3+ICIQ4 = 0 (<i>n</i> = 108/408, 26%)</b>                                                          |                   |                     |                 |
| TTRT (cut-off: 6.9 mo)                                                                                                              | -1.429 ± 0.257    | 0.24 (0.14 – 0.40)  | < 0.0001        |
| Age                                                                                                                                 | -0.059 ± 0.017    | 0.94 (0.90 – 0.98)  | 0.001           |
| Constant:                                                                                                                           | 3.445             |                     |                 |
| H&L <i>p</i> -value = 0.185; Brier score = 0.176 (Corrected for optimism: 0.178); Calibration slope = 0.956; R <sup>2</sup> = 0.837 |                   |                     |                 |

EPQ-R = Eysenck Personality Questionnaire Revised; ICIQ-SF = International Consultation on Incontinence Modular Questionnaire Short Form; TTRT = time-to-radiotherapy; RP = radical prostatectomy; H&L = Hosmer and Lemeshow test.

**Table S4.** *p*-values and odds ratios (95% CI in bracket) resulting from uni-variable logistic regression analyses related to the “completely dry” end-point. *p*-values < 0.1 are in bold.

|                           | <i>p</i> -value    | Odds-ratio | (95% CI)    |
|---------------------------|--------------------|------------|-------------|
| Age (yr)                  | <b>0.006</b>       | 0.95       | (0.92-0.99) |
| BMI (kg/m <sup>2</sup> )  | 0.505              | 0.98       | (0.92-1.04) |
| PSA (ng/ml)               |                    |            |             |
| pre-RP                    | <b>0.037</b>       | 0.98       | (0.95-1.00) |
| post-RP                   | 0.686              | 1.04       | (0.83-1.28) |
| pre-RT                    | 0.220              | 0.92       | (0.76-1.01) |
| Time to RT (mo)           |                    |            |             |
| ≥ cut-off time            | Ref.               | Ref.       | Ref.        |
| < cut-off time            | <b>&lt; 0.0001</b> | 0.27       | (0.16-0.43) |
| N° of removed lymph nodes | 0.928              | 1.00       | (0.98-1.02) |
| Hypertension              |                    |            |             |
| No                        | Ref.               | Ref.       |             |
| Yes                       | 0.773              | 0.94       | (0.60-.46)  |
| Smoke                     |                    |            |             |
| No                        | Ref.               | Ref.       |             |
| Yes                       | 0.997              | 1.00       | (0.54-1.78) |
| Diabetes                  |                    |            |             |
| No                        | Ref.               | Ref.       |             |
| Yes                       | 0.179              | 0.48       | (0.14-1.27) |
| ADT                       |                    |            |             |
| No                        | Ref.               | Ref.       |             |
| Yes                       | 0.100              | 0.68       | (0.43-1.07) |
| Surgery                   |                    |            |             |

|                 |              |      |             |
|-----------------|--------------|------|-------------|
| Open            | Ref.         | Ref. |             |
| Robotic         | 0.201        | 1.38 | (0.84-2.24) |
| Laparoscopic    | 0.633        | 1.20 | (0.56-2.43) |
| Gleason score   |              |      |             |
| ISUP Groups 1-3 | Ref.         | Ref. |             |
| ISUP Groups 4-5 | 0.677        | 0.90 | (0.54-1.50) |
| Stage T         |              |      |             |
| pT2             | Ref.         | Ref. |             |
| pT3a            | 0.507        | 0.84 | (0.50-1.41) |
| pT3b & pT4      | <b>0.002</b> | 0.41 | (0.23-0.72) |
| EPQ-R           |              |      |             |
| Extroversion    | 0.440        | 0.95 | (0.83-1.09) |
| Neuroticism     | <b>0.065</b> | 0.87 | (0.74-1.01) |
| Psychoticism    | 0.414        | 1.09 | (0.88-1.33) |
| Lie             | 0.464        | 1.07 | (0.89-1.31) |

ICIQ3, ICIQ4, ICIQ5 = score of the International Consultation on Incontinence Modular Questionnaire Short Form for questions three, four and five respectively; BMI = body mass index; RP = radical prostatectomy; RT = radiotherapy; ADT = androgen deprivation therapy; EPQR = Eysenck Personality Questionnaire – Revised.

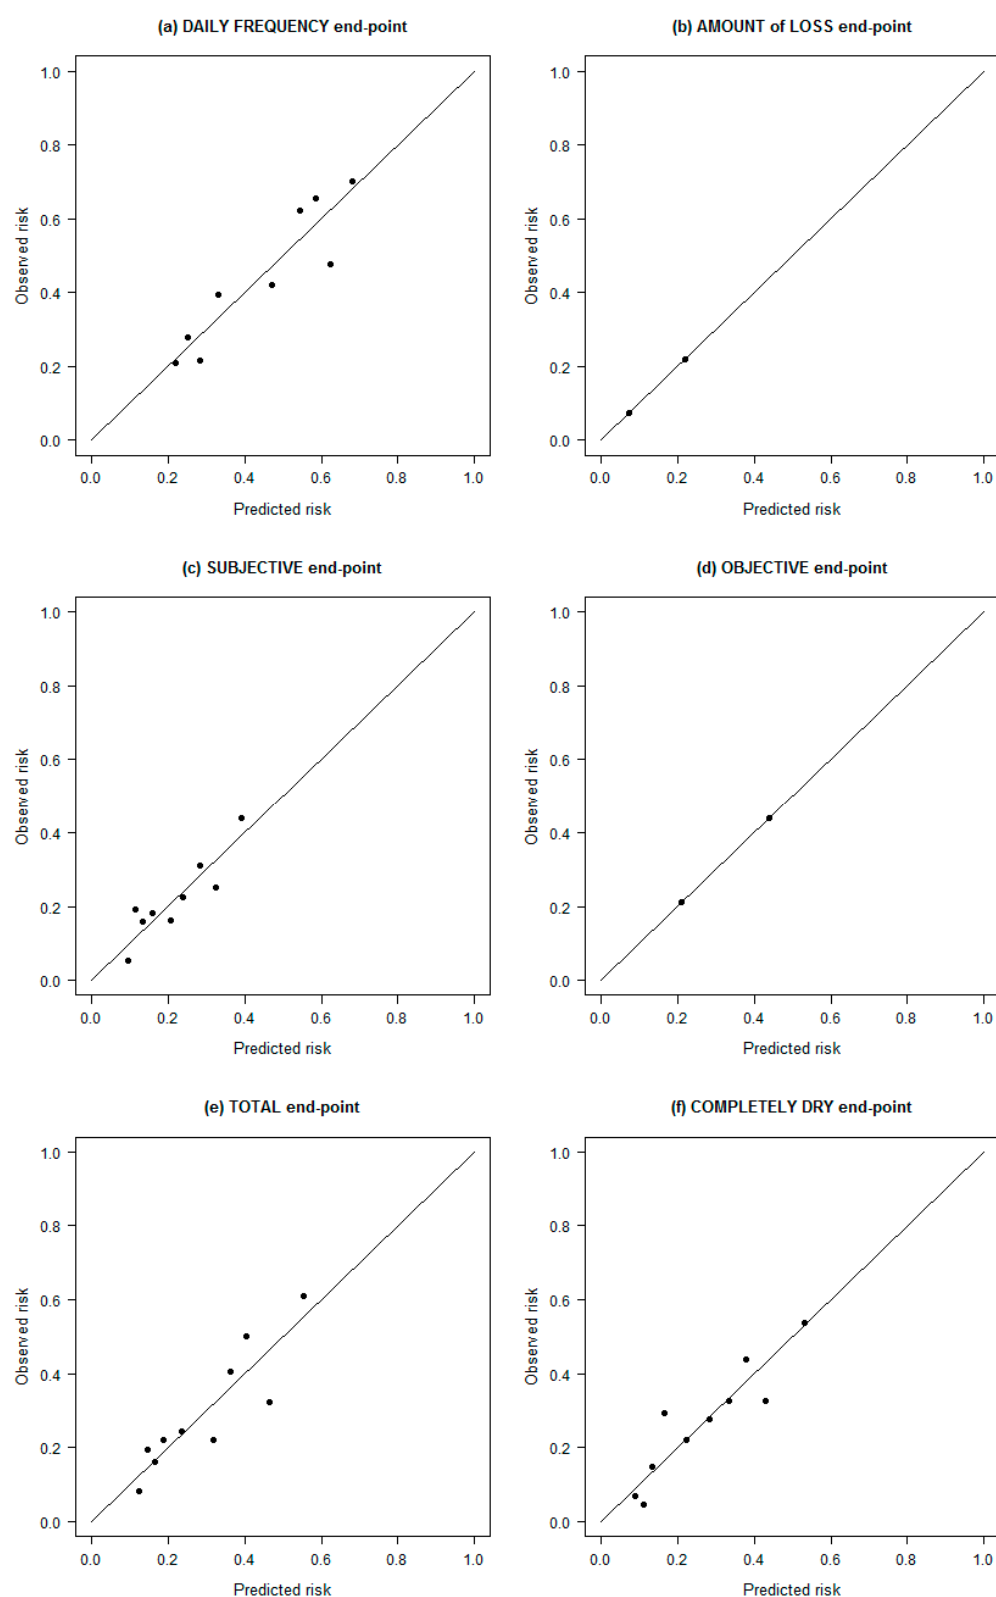

**Figure S1.** Calibration plot of the final multivariate model related to each ICIQ based end-point.

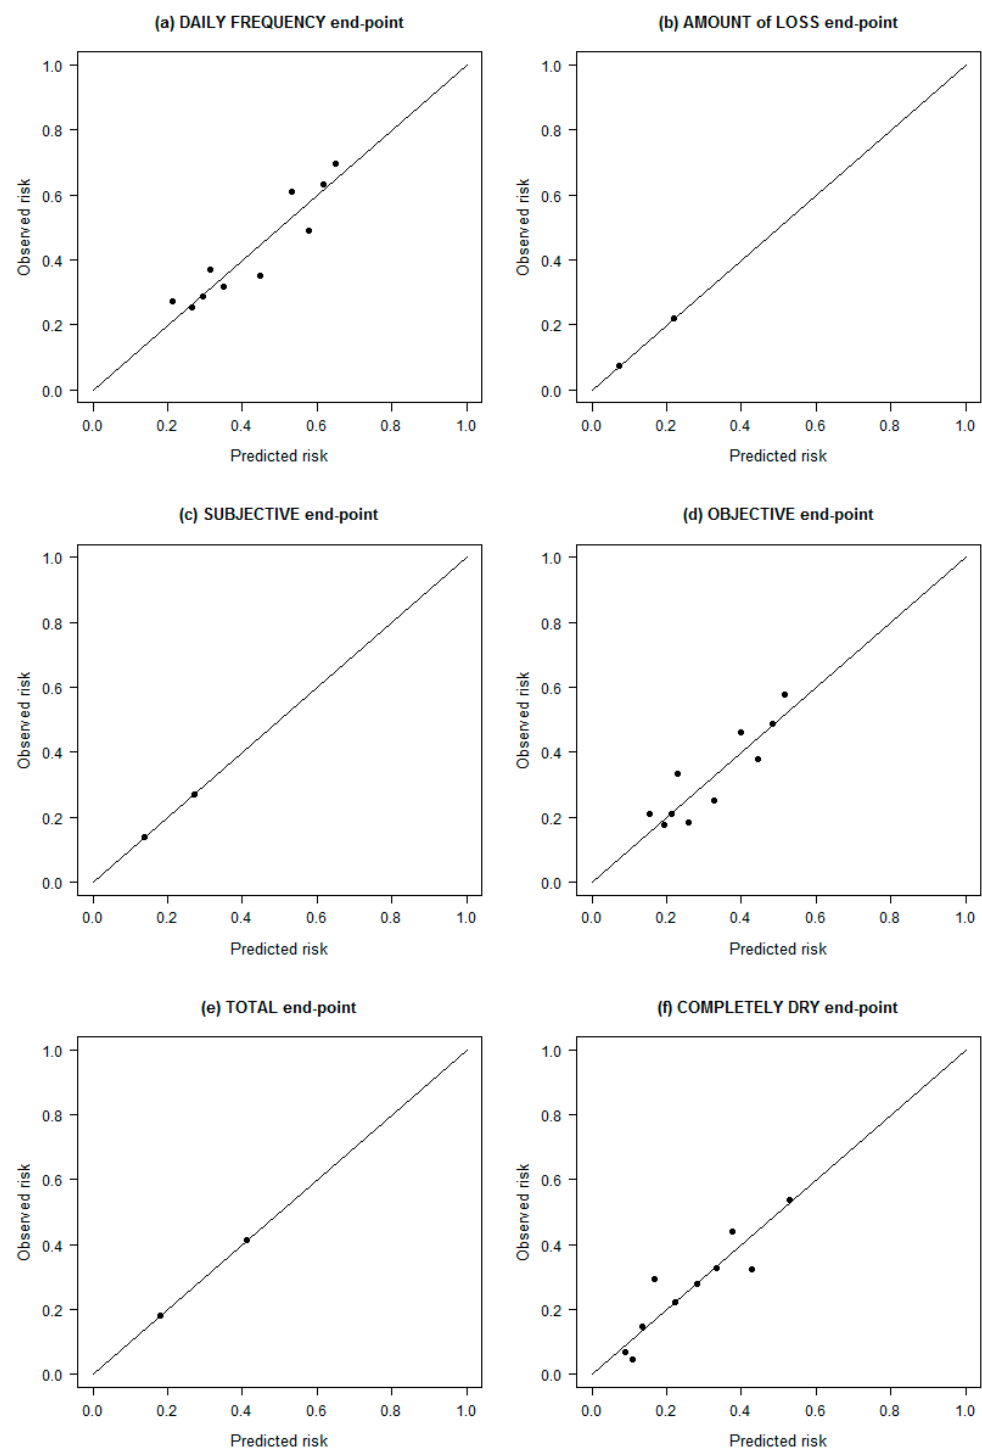

**Figure S2.** Calibration plot of the final multivariate model related to each ICIQ based end-point. EPQ-R variables were excluded from these analyses.

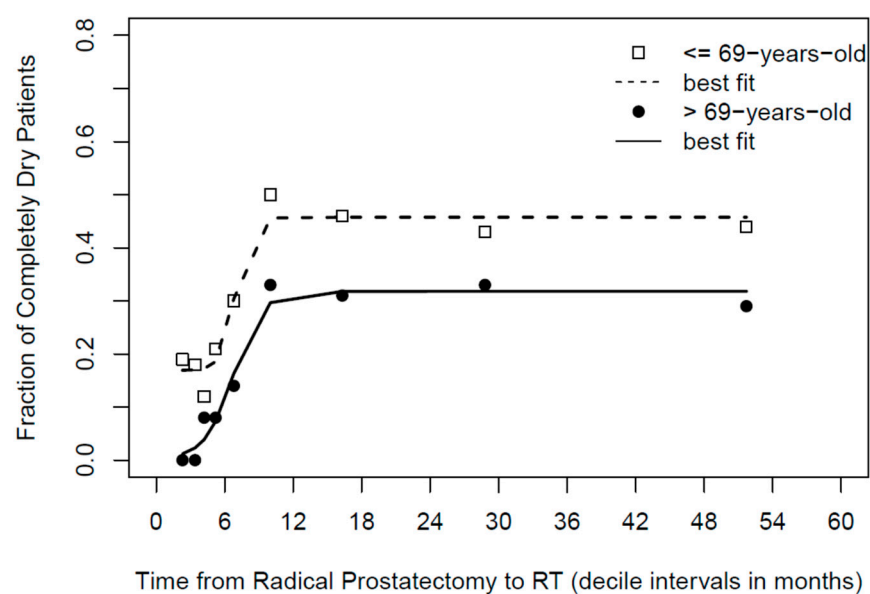

**Figure S3.** Plot of the fraction of “completely dry” patients (showing ICIQ3+ICIQ4=0) against the time between prostatectomy and radiotherapy, according to patient age ( $\leq 69$ yr vs.  $> 69$ yr).
